# Supplementary material for: Incorporation of well-dispersed calcium phosphate nanoparticles into PLGA electrospun nanofibers to enhance the osteogenic induction potential
Source: Royal Society of Chemistry journal article supplement (doi:10.1039/c7ra01865g), 2017-01-01
Supplement: c7ra01865g1.pdf [file c7ra01865g1.pdf]

Supporting Information for:

**Incorporation of well-dispersed calcium phosphate nanoparticles into PLGA  
electrospun nanofibers to enhance the osteogenic induction potential**

Dandan Wang<sup>a,b</sup>, Liuyang Xuan<sup>a,b</sup>, Huixiang Zhong<sup>a,b</sup>, Yihong Gong<sup>a,b</sup>, Xuetao Shi<sup>c</sup>,  
Feng Ye<sup>d</sup>, Yan Li<sup>a,b\*</sup> and Qing Jiang<sup>a,b</sup>

<sup>a</sup>Department of Biomedical Engineering, Guangdong Provincial Key Laboratory of Sensor Technology and Biomedical Instrument, School of Engineering, Sun Yat-sen University, Guangzhou, Guangdong, P.R. China

<sup>b</sup>Guangdong Provincial Engineering and Technology Center of Advanced and Portable Medical Devices, Sun Yat-sen University, Guangzhou, Guangdong, P.R. China

<sup>c</sup>School of Materials Science and Engineering, South China University of Technology, Guangzhou, P.R. China

<sup>d</sup>Key Laboratory of Molecular Biology for Infectious Diseases, Ministry of Education of China, The Second Affiliated Hospital, Chongqing Medical University, Chongqing, P.R. China

\*Corresponding author: Yan Li, Telephone: +86-20-39387890; Fax: +86-20-39387890; Email: liyan99@mail.s ysu.edu.cn

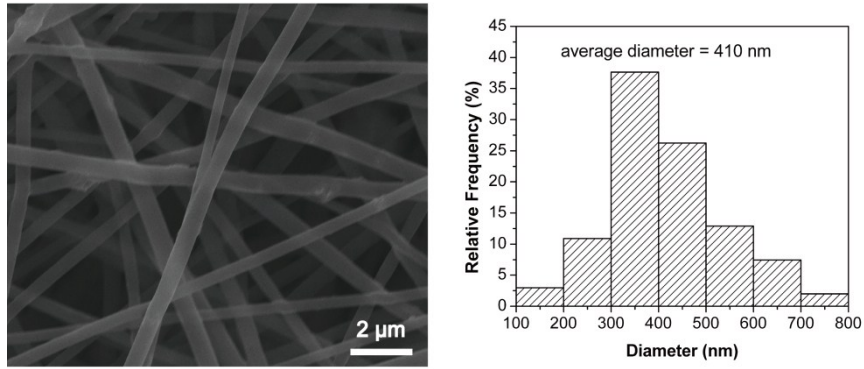

**Fig. S1** SEM image and fiber diameter distribution of P-8 which was fabricated at weight ratio of (PAA-CaP/Zn)/PLGA as 8% and following the same parameters as that for other PLGA electrospun membranes.
